# Supplementary material
Source: publisher figshare collection journal article supplement (https://frontiersin.figshare.com/ndownloader/files/27192503)
Supplement: Supplementary file [file 27192503]

**Supplementary Table 9.** Overview of Studies Included in the Meta-Analysis

| Authors        | Year | <i>N</i> | Study rigor   | Intervention  | Operationalization                                                                                                                                                | Outcome<br>(original wording)                                                    | Operationalization                                                                                    | <i>r</i> |
|----------------|------|----------|---------------|---------------|-------------------------------------------------------------------------------------------------------------------------------------------------------------------|----------------------------------------------------------------------------------|-------------------------------------------------------------------------------------------------------|----------|
| Arasi & Aghdam | 2016 | 330      | correlational | NA            | Questionnaire developed by previous study (no examples given)                                                                                                     | Organizational commitment (affective duty commitment)                            | Questionnaire developed by Mowday et al. (1979) and Meyer and Allen (1997)                            | .33      |
| Avgoustaki     | 2016 | 29,537   | correlational | Task rotation | Does your job involve rotating tasks between yourself and colleagues? (yes/no)                                                                                    | Job involvement (extensive work effort)                                          | How many times a month do you work more than 10 hours a day?                                          | .06      |
| Balogh et al.  | 2016 | 828      | correlational | Task rotation | Observation of work tasks: cashier work, picking work, delicatessen work, and mixed work                                                                          | Musculoskeletal complaints (neck/shoulder complaints)                            | Standardized Nordic Questionnaire (Kuorinka et al., 1987)                                             | -.09     |
| Bao et al.     | 2016 | 1,834    | correlational | Task rotation | Interview and observation: dichotomized variable whether worker was assigned with more than one single task for a period of time in their job during a work shift | Musculoskeletal complaints (elbow/hand complaints)                               | Standardized Nordic Questionnaire (Kuorinka et al., 1987)                                             | .02      |
|                |      |          |               |               |                                                                                                                                                                   | Job satisfaction                                                                 | All in all, how satisfied are you with your job?                                                      | -.13     |
|                |      |          |               |               |                                                                                                                                                                   | Organizational commitment (recommend job to others)                              | How strongly would you recommend your job to someone else?                                            | -.07     |
|                |      |          |               |               |                                                                                                                                                                   | Organizational commitment (take this job again)                                  | If you were looking for a new job now, how likely is it that you would decide to take this job again? | -.13     |
|                |      |          |               |               |                                                                                                                                                                   | Physical workload (physical exhaustion)                                          | How often are you physically exhausted after work?                                                    | -.00     |
|                |      |          |               |               |                                                                                                                                                                   | General physical health (general health)                                         | How would you describe your general health compared to others of your own age?                        | -.01     |
|                |      |          |               |               |                                                                                                                                                                   | Stress and burnout (depressed)                                                   | How often during the past year have you felt “down”, blue, or depressed?                              | -.04     |
| Bodin          | 2011 | 3,710    | correlational | Both          | Job/task rotation $\geq$ once per week (yes/no)                                                                                                                   | Stress and burnout (mental exhaustion)                                           | How often are you mentally exhausted after work?                                                      | -.03     |
|                |      |          |               |               |                                                                                                                                                                   | Musculoskeletal complaints (shoulder pain with or without rotator cuff syndrome) | Physical examination                                                                                  | .04      |

| Authors         | Year | <i>N</i> | Study rigor   | Intervention  | Operationalization                                                                                                                                    | Outcome<br>(original wording)                              | Operationalization                                                                                     | <i>r</i> |
|-----------------|------|----------|---------------|---------------|-------------------------------------------------------------------------------------------------------------------------------------------------------|------------------------------------------------------------|--------------------------------------------------------------------------------------------------------|----------|
| Bouville & Alis | 2014 | 24,486   | correlational | Task rotation | Do you occupy different workstations? (yes/no)                                                                                                        | Job satisfaction                                           | On the whole, I am satisfied with my job.                                                              | -.06     |
|                 |      |          |               |               |                                                                                                                                                       | Turnover intention (intent to stay)                        | Do you intend to change work positions or jobs?                                                        | .08      |
|                 |      |          |               |               |                                                                                                                                                       | Competence development (problem-solving demand)            | In your work, have you had the possibility to solve a problem, should one arise? (yes/no)              | -.04     |
|                 |      |          |               |               |                                                                                                                                                       | General physical health                                    | Self-developed items (e.g., my work is rather harmful to my health)                                    | -.06     |
| Campion et al.  | 1994 | 255      | correlational | Job rotation  | Number of rotations (defined as change in job title or department without increase in salary) divided by number of years employed in the organization | Individual performance                                     | Personnel records                                                                                      | .25      |
|                 |      |          |               |               |                                                                                                                                                       | Career success (promotion rate)                            | Number of promotions divided by number of years of tenure                                              | .37      |
|                 |      |          |               |               |                                                                                                                                                       | Career success (salary growth)                             | Current salary class minus salary class at entry into the company divided by number of years of tenure | .29      |
|                 |      |          |               |               |                                                                                                                                                       | Career success (career affect)                             | Extent of agreement that career affect was benefit of job rotation                                     | .17      |
|                 |      |          |               |               |                                                                                                                                                       | Competence development (administrative skills improvement) | Judgment of the extent to which job rotation generally improved each knowledge and skill               | .24      |
|                 |      |          |               |               |                                                                                                                                                       | Competence development (technical skills improvement)      | Judgment of the extent to which job rotation generally improved each knowledge and skill               | .01      |
|                 |      |          |               |               |                                                                                                                                                       | Competence development (business skills improvement)       | Judgment of the extent to which job rotation generally improved each knowledge and skill               | .27      |
|                 |      |          |               |               |                                                                                                                                                       | Competence development (personal development)              | Extent of agreement that personal development was benefit of job rotation                              | .20      |
| Choe            | 2004 | 93       | correlational | Job rotation  | Questionnaire developed by previous studies (e.g., rotating jobs among production employees and between production and other departments)             | Financial performance (cost reduction)                     | Self-developed items                                                                                   | .22      |
|                 |      |          |               |               |                                                                                                                                                       | Speed of product development (flexibility)                 | Self-developed items                                                                                   | .24      |
| Colombo et al.  | 2007 | 763      | correlational | Both          | Do operators rotate across jobs or tasks on the line? (yes/no)                                                                                        | Financial performance (profitability)                      | Company data on returns on investment                                                                  | .01      |

| Authors                | Year | <i>N</i> | Study rigor          | Intervention  | Operationalization                                                                                           | Outcome<br>(original wording)                                                                             | Operationalization                                                                                 | <i>r</i>                |
|------------------------|------|----------|----------------------|---------------|--------------------------------------------------------------------------------------------------------------|-----------------------------------------------------------------------------------------------------------|----------------------------------------------------------------------------------------------------|-------------------------|
| Comper et al.          | 2017 | 368      | (quasi-)experimental | Task rotation | Intervention: participants rotated between tasks (experimental condition) or not (control condition)         | General physical health                                                                                   | WHO Quality of Life Scale (Fleck et al. 2000)                                                      | -.01                    |
|                        |      |          |                      |               |                                                                                                              | Musculoskeletal complaints (working hours lost due to sick leave resulting from musculoskeletal diseases) | Sick notes                                                                                         | -.09                    |
|                        |      |          |                      |               |                                                                                                              | General psychological health                                                                              | WHO Quality of Life Scale (Fleck et al. 2000)                                                      | .04                     |
|                        |      |          |                      |               |                                                                                                              | Stress and burnout (fatigue)                                                                              | Need for Recovery Scale (Moriguchi et al. 2010)                                                    | -.03                    |
|                        |      |          |                      |               |                                                                                                              | Individual performance (productivity)                                                                     | WHO Health and Work Performance Questionnaire (Kessler et al., 2003)                               | .14                     |
| Cruz & Pil             | 2011 | 1,708    | correlational        | Both          | Managers indicated whether team members rotated tasks or roles (yes/no)                                      | Stress and burnout                                                                                        | Warr's (1990) measure of job anxiety-contentment                                                   | -.07                    |
| de Clerq et al.        | 2013 | 232      | correlational        | Job rotation  | Questionnaire developed by previous studies (e.g., extent to which employees rotate across functional areas) | Innovativeness (product innovativeness)                                                                   | Items adapted from previous study (e.g., extent to which employees rotate across functional areas) | .16                     |
| de Leeuw & Wiers       | 2015 | 52       | correlational        | NA            | Questionnaire about the application of manpower planning strategies                                          | Productivity (utilization)                                                                                | NA                                                                                                 | .42                     |
|                        |      |          |                      |               |                                                                                                              | Productivity                                                                                              | NA                                                                                                 | .31                     |
| Delobbe & Vandenberghe | 2001 | 201      | correlational        | Job rotation  | Objective data: number of different jobs during the onboarding of new employees                              | Organizational commitment                                                                                 | Questionnaire developed by Allen & Meyer (1990)                                                    | .15                     |
|                        |      |          |                      |               |                                                                                                              | Job satisfaction                                                                                          | Items adapted from previous study (e.g., overall, I am satisfied with my job)                      | .22                     |
|                        |      |          |                      |               |                                                                                                              | Turnover intention                                                                                        | Items adapted from previous study (e.g., I often think about leaving this organization)            | -.12                    |
| Dinis & Fronteira      | 2015 | 55       | correlational        | Job rotation  | Number of work shifts carried out in different units                                                         | Job satisfaction                                                                                          | Questionnaire developed by Graça (1999)                                                            | -.43 – .18 <sup>a</sup> |

| Authors    | Year | <i>N</i> | Study rigor   | Intervention | Operationalization                                                                                      | Outcome<br>(original wording)             | Operationalization                                                               | <i>r</i> |
|------------|------|----------|---------------|--------------|---------------------------------------------------------------------------------------------------------|-------------------------------------------|----------------------------------------------------------------------------------|----------|
| Godard     | 2001 | 508      | correlational | NA           | Is there a job rotation program? (yes/no)                                                               | Job involvement (task involvement)        | Items adapted from previous studies (e.g., the work you do is meaningful to you) | .03      |
|            |      |          |               |              |                                                                                                         | Stress and burnout (stressfulness)        | Items adapted from previous studies (e.g., your job is stressful)                | .01      |
|            |      |          |               |              |                                                                                                         | Stress and burnout (fatigue)              | Self-developed items (e.g., you are often worn out by the end of the day)        | -.02     |
|            |      |          |               |              |                                                                                                         | Job satisfaction                          | Michigan Organizational Assessment Package (Institute for Social Research 1975)  | .02      |
|            |      |          |               |              |                                                                                                         | Organizational commitment                 | Organizational Commitment Questionnaire (Mowday et al., 1982)                    | .04      |
|            |      |          |               |              |                                                                                                         | Work motivation                           | Self-developed items (e.g., you are highly committed to do the best job you can) | -.01     |
| Han et al. | 2020 | 985      | correlational | Job rotation | Whether or not employees did job rotation in low altitude                                               | General physical health (hyperhemoglobin) | Physical examination                                                             | .17      |
| He et al.  | 2016 | 725      | correlational | Job rotation | Items adapted from established scale (e.g., co-location of design engineers and manufacturing managers) | Speed of new product development          | Items from previous studies (no examples given)                                  | .19      |

| Authors       | Year | <i>N</i> | Study rigor          | Intervention  | Operationalization                                                                                                                                               | Outcome<br>(original wording)                                          | Operationalization                                              | <i>r</i>                |
|---------------|------|----------|----------------------|---------------|------------------------------------------------------------------------------------------------------------------------------------------------------------------|------------------------------------------------------------------------|-----------------------------------------------------------------|-------------------------|
| Horton et al. | 2012 | 12       | (quasi-)experimental | Task rotation | Experiment in which participants rotated between tasks with low and high exertion levels (experimental condition) or performed only one task (control condition) | Physical workload (muscle fatigue)                                     | Objective physical data: electromyographic amplitude            | .76 / -.59 <sup>b</sup> |
|               |      |          |                      |               |                                                                                                                                                                  | Physical workload (muscle fatigue)                                     | Objective physical data: electromyographic mean power frequency | -.17 / .28 <sup>b</sup> |
|               |      |          |                      |               |                                                                                                                                                                  | Physical workload (muscle fatigue)                                     | Objective physical data: Dimitrov Spectral Index                | .26 / -.27 <sup>b</sup> |
|               |      |          |                      |               |                                                                                                                                                                  | Musculoskeletal complaints (rating of perceived discomfort shoulder)   | Borg scale (Borg, 1990)                                         | .24 / -.28 <sup>b</sup> |
|               |      |          |                      |               |                                                                                                                                                                  | Musculoskeletal complaints (rating of perceived discomfort upper arm)  | Borg scale (Borg, 1990)                                         | .16 / -.32 <sup>b</sup> |
|               |      |          |                      |               |                                                                                                                                                                  | Musculoskeletal complaints (rating of perceived discomfort upper back) | Borg scale (Borg, 1990)                                         | .16 / -.32 <sup>b</sup> |
|               |      |          |                      |               |                                                                                                                                                                  | Individual performance (moment fluctuations)                           | Errors during task execution                                    | .00 / .11 <sup>b</sup>  |
|               |      |          |                      |               |                                                                                                                                                                  | Individual performance (sample entropy)                                | Errors during task execution                                    | -.64 / .44 <sup>b</sup> |
| Horton et al. | 2013 | 12       | (quasi-)experimental | Task rotation | Experiment in which participants rotated between tasks with low and high exertion levels (experimental condition) or performed only one task (control condition) | Individual performance (peak error)                                    | Errors during task execution                                    | -.04 / .11 <sup>b</sup> |
|               |      |          |                      |               |                                                                                                                                                                  | Musculoskeletal complaints (rating of perceived discomfort shoulder)   | Borg scale (Borg, 1990)                                         | .26 / -.51 <sup>b</sup> |
|               |      |          |                      |               |                                                                                                                                                                  | Musculoskeletal complaints (rating of perceived discomfort upper arm)  | Borg scale (Borg, 1990)                                         | .12 / -.21 <sup>b</sup> |
|               |      |          |                      |               |                                                                                                                                                                  | Musculoskeletal complaints (rating of perceived discomfort upper back) | Borg scale (Borg, 1990)                                         | .03 / -.31 <sup>b</sup> |
|               |      |          |                      |               |                                                                                                                                                                  | Physical workload (muscle fatigue)                                     | Objective physical data: electromyographic mean power frequency | -.22 / .11 <sup>b</sup> |
|               |      |          |                      |               |                                                                                                                                                                  | Physical workload (heart rate)                                         | Percentage of heart rate reserve                                | .12 / .00 <sup>b</sup>  |
|               |      |          |                      |               |                                                                                                                                                                  | Individual performance                                                 | Completed number of assemblies                                  | -.16 / .09 <sup>b</sup> |

| Authors        | Year | <i>N</i> | Study rigor          | Intervention  | Operationalization                                                                                                                                               | Outcome<br>(original wording)                                            | Operationalization                                                                                        | <i>r</i>                |
|----------------|------|----------|----------------------|---------------|------------------------------------------------------------------------------------------------------------------------------------------------------------------|--------------------------------------------------------------------------|-----------------------------------------------------------------------------------------------------------|-------------------------|
| Horton et al.  | 2015 | 12       | (quasi-)experimental | Task rotation | Experiment in which participants rotated between tasks with low and high exertion levels (experimental condition) or performed only one task (control condition) | Musculoskeletal complaints (rating of perceived discomfort lower back)   | Borg scale (Borg, 1990)                                                                                   | .19 / -.22 <sup>b</sup> |
|                |      |          |                      |               |                                                                                                                                                                  | Musculoskeletal complaints (rating of perceived discomfort upper back)   | Borg scale (Borg, 1990)                                                                                   | .08 / -.15 <sup>b</sup> |
|                |      |          |                      |               |                                                                                                                                                                  | Musculoskeletal complaints (rating of perceived discomfort shoulder)     | Borg scale (Borg, 1990)                                                                                   | .17 / -.19 <sup>b</sup> |
|                |      |          |                      |               |                                                                                                                                                                  | Musculoskeletal complaints (rating of perceived discomfort upper arm)    | Borg scale (Borg, 1990)                                                                                   | .23 / -.21 <sup>b</sup> |
|                |      |          |                      |               |                                                                                                                                                                  | Physical workload (heart rate)                                           | Percentage of heart rate reserve                                                                          | .33 / -.38 <sup>b</sup> |
| Hsieh & Chao   | 2004 | 304      | correlational        | Job rotation  | Items adapted from established scale (no examples given)                                                                                                         | Stress and burnout (exhaustion)                                          | Maslach Burnout Inventory (Maslach et al., 1996)                                                          | -.11                    |
|                |      |          |                      |               |                                                                                                                                                                  | Stress and burnout (cynicism)                                            | Maslach Burnout Inventory (Maslach et al., 1996)                                                          | -.02                    |
|                |      |          |                      |               |                                                                                                                                                                  | Stress and burnout (professional efficacy)                               | Maslach Burnout Inventory (Maslach et al., 1996)                                                          | .09                     |
|                |      |          |                      |               |                                                                                                                                                                  | Labor flexibility (job specialization)                                   | Self-developed items based on previous studies (e.g., what do you think of your job techniques or skills) | .33                     |
| Iwakiri et al. | 2016 | 347      | correlational        | NA            | Work rotation (doing/not doing)                                                                                                                                  | Musculoskeletal complaints (low back pain)                               | Self-report of low back pain                                                                              | -.20                    |
| Jeon & Jeong   | 2013 | 1,115    | correlational        | Task rotation | Self-classification into one of the clusters hourly, daily, weekly, monthly rotation between 8, 20, or 23 tasks (or no rotation)                                 | Musculoskeletal complaints (musculoskeletal patient rate)                | Self-developed item (not indicated)                                                                       | .02 - .41 <sup>a</sup>  |
|                |      |          |                      |               |                                                                                                                                                                  | Musculoskeletal complaints (sick leave due to musculoskeletal disorders) | Self-developed item (not indicated)                                                                       | -.06 - .53 <sup>a</sup> |

| Authors           | Year | <i>N</i> | Study rigor          | Intervention  | Operationalization                                                                                                                   | Outcome<br>(original wording)                                               | Operationalization                                                                             | <i>r</i>                |
|-------------------|------|----------|----------------------|---------------|--------------------------------------------------------------------------------------------------------------------------------------|-----------------------------------------------------------------------------|------------------------------------------------------------------------------------------------|-------------------------|
| Jeon & Jeong      | 2016 | 1,115    | correlational        | Task rotation | Self-classification into one of the clusters hourly, daily, weekly, monthly rotation between 8, 20, or 23 tasks (or no rotation)     | Job satisfaction                                                            | Self-developed item (not indicated)                                                            | .02 – .51 <sup>a</sup>  |
|                   |      |          |                      |               |                                                                                                                                      | Musculoskeletal complaints (musculoskeletal disorder rate)                  | Self-developed item (not indicated)                                                            | –.21 – .14 <sup>a</sup> |
|                   |      |          |                      |               |                                                                                                                                      | Musculoskeletal complaints (subjective musculoskeletal disorder prevention) | Self-developed item (not indicated)                                                            | –.34 – .18 <sup>a</sup> |
|                   |      |          |                      |               |                                                                                                                                      | Productivity                                                                | Self-developed item (not indicated)                                                            | –.38 – .13 <sup>a</sup> |
|                   |      |          |                      |               |                                                                                                                                      | Productivity (subjective)                                                   | Self-developed item (not indicated)                                                            | –.14 – .32 <sup>a</sup> |
| Jones & James     | 2018 | 16       | (quasi-)experimental | Task rotation | Intervention, in which experimental group rotated between five main tasks in an underground coal mine (e.g., right bolter, supplies) | General physical health                                                     | WHO Quality of Life scale Australian edition (Murphy et al., 2000)                             | .03                     |
|                   |      |          |                      |               |                                                                                                                                      | General psychological health                                                | WHO Quality of Life Scale Australian edition (Murphy et al., 2000)                             | .43                     |
|                   |      |          |                      |               |                                                                                                                                      | Stress and burnout (fatigue)                                                | Need for Recovery after Work Scale (Sluiter et al., 2003)                                      | –.32                    |
| Kampkötter et al. | 2016 | 90,321   | correlational        | Job rotation  | Rotation as given when employee worked in a different function in year 2005 than in year 2004                                        | Individual performance (performance rank)                                   | Rank position of the respective employee in the relative bonus distribution in their work unit | .01                     |
|                   |      | 91,987   | correlational        | Job rotation  | Rotation as given when employee worked in a different function in year 2005 than in year 2004                                        | Individual performance (bonus payment)                                      | Company data of annual, short-term performance-related bonus payment                           | .02                     |
|                   |      |          |                      |               |                                                                                                                                      | Individual performance (performance rank)                                   | Rank position of the respective employee in the relative bonus distribution in their work unit | .00                     |
|                   |      |          |                      |               |                                                                                                                                      | Individual performance (bonus payment)                                      | Company data of annual, short-term performance-related bonus payment                           | –.02                    |
| Khan et al.       | 2016 | 435      | correlational        | NA            | NA                                                                                                                                   | Organizational commitment                                                   | Allen and Meyer (1990)                                                                         | .70                     |
|                   |      |          |                      |               |                                                                                                                                      | Individual performance                                                      | Self-developed items (no example given)                                                        | .69                     |

| Authors                      | Year | <i>N</i> | Study rigor          | Intervention  | Operationalization                                                                                                                                       | Outcome<br>(original wording)                              | Operationalization                                                                                                        | <i>r</i>                   |
|------------------------------|------|----------|----------------------|---------------|----------------------------------------------------------------------------------------------------------------------------------------------------------|------------------------------------------------------------|---------------------------------------------------------------------------------------------------------------------------|----------------------------|
| Kim et al.                   | 2016 | 246      | correlational        | Job rotation  | Self-developed questionnaire (e.g., interdepartmental transfer within the organization)                                                                  | Stress and burnout (job engagement – vigor)                | Questionnaire developed by Schaufeli et al. (2002)                                                                        | –.21                       |
|                              |      |          |                      |               |                                                                                                                                                          | Stress and burnout (job engagement – dedication)           | Questionnaire developed by Schaufeli et al. (2002)                                                                        | –.25                       |
|                              |      |          |                      |               |                                                                                                                                                          | Stress and burnout (burnout – exhaustion)                  | Questionnaire developed by Schaufeli et al. (2002)                                                                        | –.29                       |
|                              |      |          |                      |               |                                                                                                                                                          | Stress and burnout (burnout – cynicism)                    | Questionnaire developed by Schaufeli et al. (2002)                                                                        | –.28                       |
|                              |      |          |                      |               |                                                                                                                                                          | Turnover intention                                         | Items based on previous studies (e.g., I have considered changing my job seriously before)                                | –.24                       |
| Koncar et al.                | 2020 | 325      | correlational        | Job rotation  | Degree of openness, possibilities and management support for changing a workplace within the company                                                     | General psychological health (welfare)                     | Self-developed item (no example given)                                                                                    | .43                        |
| Kuijer et al.                | 1999 | 8        | (quasi-)experimental | Task rotation | Intervention: experimental group rotated between two of three tasks (e.g., refuse collecting and street sweeping), control group performed only one task | Physical workload (rating of perceived fatigue)            | Questionnaire developed by Borg and Borg (1987)                                                                           | –.80 – (–.21) <sup>a</sup> |
|                              |      |          |                      |               |                                                                                                                                                          | Physical workload (rating of perceived exertion)           | Questionnaire developed by Meikman et al. (1986)                                                                          | –.85 – (–.51) <sup>a</sup> |
|                              |      |          |                      |               |                                                                                                                                                          | Physical workload (heart rate reserve)                     | Objective data of percentage of heart rate reserve                                                                        | –.90 – .12 <sup>a</sup>    |
| Kuijer et al.                | 2005 | 67       | (quasi-)experimental | Task rotation | Intervention: experimental group rotated between two tasks (refuse collecting and truck driving), control group performed only one task                  | Stress and burnout (need for recovery)                     | Questionnaire developed by Van Veldhoven and Meijman (1994)                                                               | –.02                       |
| Le Meunier-Fitzhugh & Massey | 2019 | 146      | correlational        | Job rotation  | There is an opportunity for sales and marketing staff to transfer between departments (not at all – an extreme extent)                                   | Financial performance (business performance)               | Items adapted from previous study (e.g., how successful is the organization at generating a high level of sales revenue?) | .25                        |
| Leenders & Wierenga          | 2002 | 148      | correlational        | Job rotation  | Proportion of managers involved in cross-functional job rotation                                                                                         | Speed of new product development (new product performance) | Items based on previous studies (e.g., the speed at which new products are developed)                                     | .11                        |



| Authors            | Year | <i>N</i> | Study rigor          | Intervention  | Operationalization                                                                                                                                                      | Outcome<br>(original wording)                                   | Operationalization                                                                                                                                                                          | <i>r</i> |
|--------------------|------|----------|----------------------|---------------|-------------------------------------------------------------------------------------------------------------------------------------------------------------------------|-----------------------------------------------------------------|---------------------------------------------------------------------------------------------------------------------------------------------------------------------------------------------|----------|
| Luger et al.       | 2016 | 10       | (quasi-)experimental | Task rotation | Experiment in which participants rotated between static and dynamic tasks (experimental condition) or performed only one task (control condition)                       | Stress and burnout (lack of energy)                             | SOFI Swedish Occupational Fatigue Inventory (Ahsberg et al., 1997)                                                                                                                          | -.09     |
|                    |      |          |                      |               |                                                                                                                                                                         | Physical workload (physical exertion)                           | SOFI Swedish Occupational Fatigue Inventory (Ahsberg et al., 1997)                                                                                                                          | -.20     |
|                    |      |          |                      |               |                                                                                                                                                                         | Physical workload (sleepiness)                                  | SOFI Swedish Occupational Fatigue Inventory (Ahsberg et al., 1997)                                                                                                                          | .10      |
|                    |      |          |                      |               |                                                                                                                                                                         | Musculoskeletal complaints (physical discomfort)                | SOFI Swedish Occupational Fatigue Inventory (Ahsberg et al., 1997)                                                                                                                          | .00      |
|                    |      |          |                      |               |                                                                                                                                                                         | Work motivation (lack of motivation)                            | SOFI Swedish Occupational Fatigue Inventory (Ahsberg et al., 1997)                                                                                                                          | -.02     |
| Martini & Cavenago | 2017 | 558      | correlational        | Task rotation | I performed different tasks in different departments within the same company (no scale indicated)                                                                       | Career success                                                  | Items based on previous studies (e.g., I am satisfied with the progress I have made toward meeting my goals for the development of new knowledge and skills)                                | .30      |
| Mlekus et al.      | 2018 | 135      | (quasi-)experimental | Task rotation | Vignette that described a workplace at which worker either rotated between four different tasks (experimental condition) or performed only one task (control condition) | Competence development (satisfaction of need for competence)    | Work-Related Basic Need Satisfaction Scale (van den Broeck et al., 2010)                                                                                                                    | .13      |
|                    |      |          |                      |               |                                                                                                                                                                         | Job satisfaction                                                | Items developed by Neuberger and Allerbeck (1978)                                                                                                                                           | .25      |
|                    |      |          |                      |               |                                                                                                                                                                         | Job satisfaction                                                | Items developed by Haarhaus (2016)                                                                                                                                                          | .25      |
|                    |      |          |                      |               |                                                                                                                                                                         | General psychological health (positive affect, negative affect) | Positive and Negative Affect Schedule (Watson et al., 1988)                                                                                                                                 | .20      |
|                    |      |          |                      |               |                                                                                                                                                                         | Work motivation                                                 | Multidimensional Work Motivation Scale (Gagné et al., 2015)                                                                                                                                 | .21      |
|                    |      |          |                      |               |                                                                                                                                                                         | Individual performance                                          | Self-developed item (on a scale from 1 to 10, how high do you estimate your performance would be in the described job as a production mechanic based on your maximum performance capacity?) | .16      |

| Authors           | Year | <i>N</i> | Study rigor          | Intervention  | Operationalization                                                                                                                                                      | Outcome<br>(original wording)                                          | Operationalization                                                                                                                                                                          | <i>r</i> |
|-------------------|------|----------|----------------------|---------------|-------------------------------------------------------------------------------------------------------------------------------------------------------------------------|------------------------------------------------------------------------|---------------------------------------------------------------------------------------------------------------------------------------------------------------------------------------------|----------|
|                   |      | 159      | (quasi-)experimental | Task rotation | Vignette that described a workplace at which worker either rotated between four different tasks (experimental condition) or performed only one task (control condition) | Competence development (satisfaction of need for competence)           | Work-Related Basic Need Satisfaction Scale (van den Broeck et al., 2010)                                                                                                                    | -.04     |
|                   |      |          |                      |               |                                                                                                                                                                         | Job satisfaction                                                       | Items developed by Neuberger and Allerbeck (1978)                                                                                                                                           | .18      |
|                   |      |          |                      |               |                                                                                                                                                                         | Job satisfaction                                                       | Items developed by and Haarhaus (2016)                                                                                                                                                      | .20      |
|                   |      |          |                      |               |                                                                                                                                                                         | General psychological health (positive affect, negative affect)        | Positive and Negative Affect Schedule (Watson et al., 1988)                                                                                                                                 | .11      |
|                   |      |          |                      |               |                                                                                                                                                                         | Work motivation                                                        | Multidimensional Work Motivation Scale (Gagné et al., 2015)                                                                                                                                 | .13      |
|                   |      |          |                      |               |                                                                                                                                                                         | Individual performance                                                 | Self-developed item (on a scale from 1 to 10, how high do you estimate your performance would be in the described job as a production mechanic based on your maximum performance capacity?) | .17      |
| Mohsan et al.     | 2012 | 285      | correlational        | NA            | NA                                                                                                                                                                      | Work motivation                                                        | Items based on previous studies                                                                                                                                                             | -.17     |
|                   |      |          |                      |               |                                                                                                                                                                         | Organizational commitment                                              | Items adopted from Mowday and Steers (1979)                                                                                                                                                 | .23      |
|                   |      |          |                      |               |                                                                                                                                                                         | Job involvement                                                        | Items adopted from Uygur and Kilic (2009)                                                                                                                                                   | .16      |
| Muramatsu et al.  | 1982 | 88       | correlational        | NA            | NA                                                                                                                                                                      | Work motivation                                                        | Self-developed items (no example given)                                                                                                                                                     | .44      |
| Nasiripour et al. | 2009 | 90       | correlational        | NA            | NA                                                                                                                                                                      | Individual performance                                                 | NA                                                                                                                                                                                          | .01      |
| Ngirande & Musara | 2016 | 85       | correlational        | NA            | NA                                                                                                                                                                      | Career success (career management and talent management effectiveness) | Self-developed items (no example given)                                                                                                                                                     | .66      |
| Ollo-Lopez et al. | 2010 | 4,251    | correlational        | Job rotation  | Indicate common situation at workplace: change job position (= 1) or always at the same job position (= 0)                                                              | Job involvement (voluntary effort)                                     | Usually, do you extend your working hours for personal reasons with or without overtime payment?                                                                                            | -.05     |
|                   |      | 12,056   | correlational        | Task rotation | Do you always perform the same tasks in your firm? (yes/no)                                                                                                             | Job involvement (voluntary effort)                                     | I am willing to work beyond what I should for the success of my organization.                                                                                                               | .05      |
| Petit et al.      | 2015 | 1532     | correlational        | both          | Job/task rotation $\geq$ once per week (yes/no)                                                                                                                         | Musculoskeletal complaints (carpal tunnel syndrome)                    | Medical examination                                                                                                                                                                         | .02      |

| Authors           | Year | <i>N</i> | Study rigor   | Intervention  | Operationalization                                                                                                                            | Outcome<br>(original wording)                                          | Operationalization                                                                                                | <i>r</i> |
|-------------------|------|----------|---------------|---------------|-----------------------------------------------------------------------------------------------------------------------------------------------|------------------------------------------------------------------------|-------------------------------------------------------------------------------------------------------------------|----------|
| Pini & Santangelo | 2005 | 199      | correlational | NA            | Firm practices job rotation (yes/no)                                                                                                          | Innovativeness (product innovation)                                    | Item, whether firm has introduced a product innovation                                                            | -.03     |
|                   |      |          |               |               |                                                                                                                                               | Innovativeness (process innovation)                                    | Item, whether firm has introduced a process innovation                                                            | .21      |
|                   |      |          |               |               |                                                                                                                                               | Innovativeness (quality innovation)                                    | Item, whether firm has introduced a quality innovation                                                            | .11      |
| Roquelaure et al. | 1997 | 130      | correlational | Task rotation | Observation: number of rotations between different workstations                                                                               | Musculoskeletal complaints (carpal tunnel syndrome)                    | Medical records                                                                                                   | -.23     |
| Roquelaure et al. | 2009 | 3,275    | correlational | Both terms    | Job/task rotation $\geq$ once per week (yes/no)                                                                                               | Musculoskeletal complaints (upper-extremity musculoskeletal disorders) | Physical examination                                                                                              | .07      |
| Sawhney           | 2013 | 74       | correlational | Job rotation  | Items based on previous studies (e.g., extent to which plant floor employees are trained by rotating between work centers)                    | Labor flexibility (labor flexibility acquired)                         | Proportion of operators able to perform multiple jobs                                                             | .57      |
|                   |      |          |               |               |                                                                                                                                               | Labor flexibility (labor flexibility implemented)                      | Self-developed items (e.g., the extent to which the labor practices allowed workers to be used for multiple jobs) | .55      |
|                   |      |          |               |               |                                                                                                                                               | Financial performance (plant performance)                              | Self-developed items (e.g., rating manufacturing cost compared to competitors)                                    | .11      |
| Selden et al.     | 2013 | 42       | correlational | NA            | Percentage of employees with access to job rotation: no employees, some employees (5–49%), most employees (50–99%), all employees             | Turnover intention (voluntary turnover)                                | Company data                                                                                                      | -.23     |
| Shin              | 2009 | 1,106    | correlational | Job rotation  | Number of employees currently involved in job rotation (defined as a work design system that allows employees to rotate among different jobs) | Turnover intention (turnover)                                          | Company data                                                                                                      | .01      |
| Song et al.       | 2006 | 277      | correlational | Job rotation  | Items from previous study (e.g., we rotate chairmanships of new product development among R&D, manufacturing, and marketing personnel)        | Organizational commitment (individual commitment)                      | Items adapted from previous study (e.g., extent to which people defended the company when others criticize it)    | -.16     |
|                   |      |          |               |               |                                                                                                                                               | Financial performance (organizational crisis)                          | Items from previous studies (e.g., frequency of organizational crises)                                            | .04      |
|                   |      |          |               |               |                                                                                                                                               | Financial performance (relative costs)                                 | Company data                                                                                                      | .01      |

| Authors        | Year | <i>N</i> | Study rigor   | Intervention  | Operationalization                                                                                                                       | Outcome<br>(original wording)                       | Operationalization                                                                                                           | <i>r</i> |
|----------------|------|----------|---------------|---------------|------------------------------------------------------------------------------------------------------------------------------------------|-----------------------------------------------------|------------------------------------------------------------------------------------------------------------------------------|----------|
| Song et al.    | 2010 | 146      | correlational | Job rotation  | Senior management promotes job rotation across departments (strongly agree – strongly agree)                                             | Innovativeness (innovation performance)             | From an overall profitability standpoint, our new product development program has been successful                            | .54      |
|                |      | 185      | correlational | Job rotation  | Items from previous studies (e.g., we rotate chairmanships of new product development among R&D, manufacturing, and marketing personnel) | Innovativeness (innovation performance)             | Self-developed items (e.g., Compared with our major competitors, our new product development program is far more successful) | -.11     |
| Tsai & Huang   | 2020 | 4,381    | correlational | Task rotation | NA                                                                                                                                       | Innovativeness (significant innovation)             | Company data: ratio of the firm's sales from front-stage innovation divided by its total sales                               | .10      |
|                |      |          |               |               |                                                                                                                                          | Innovativeness (incremental innovation)             | Company data: ratio of the firm's sales from front-stage innovation divided by its total sales                               | -.12     |
|                |      |          |               |               |                                                                                                                                          | Financial performance (sales growth)                | Company data: average growth rate of sales revenue                                                                           | .06      |
| Weichel et al. | 2010 | 248      | correlational | Task rotation | Objective company data: number of workstations that employees work on                                                                    | General physical health (work ability)              | Work Ability Index (Ilmarinen & Tempel, 2002)                                                                                | .35      |
|                |      |          |               |               |                                                                                                                                          | General physical health (take days off)             | Company data                                                                                                                 | .21      |
|                |      |          |               |               |                                                                                                                                          | General physical health (cases of illness)          | Company data                                                                                                                 | .24      |
|                |      |          |               |               |                                                                                                                                          | Musculoskeletal complaints                          | Modified version of Body Part Discomfort Scale (Corlett & Bishop, 1976)                                                      | -.35     |
|                |      |          |               |               |                                                                                                                                          | Stress and burnout (cognitive and emotional strain) | Irritation scale (Mohr et al. 2005)                                                                                          | -.23     |
|                |      |          |               |               |                                                                                                                                          | Job involvement (resignation)                       | Work-related behaviour and coping styles inventory; (Schaarschmidt & Fischer, 1996)                                          | .22      |
| Zhu et al.     | 2013 | 47       | correlational | Job rotation  | Objective company data: number of job titles held by the person                                                                          | Labor flexibility (adaptability)                    | Expert judgment whether employees could work in a variety of situations, and with various individuals or groups              | -.41     |
| Zwick          | 2002 | 2,460    | correlational | NA            | Job rotation offered in 1997? (yes/no)                                                                                                   | Organizational performance (productivity)           | Company data                                                                                                                 | .02      |
|                |      |          |               |               |                                                                                                                                          | Organizational performance (productivity)           | Company data                                                                                                                 | .02      |

*Note.* <sup>a</sup>Study reported relationship for multiple groups, values indicate range.

<sup>b</sup>First value indicates comparison with low-intensity work, second value indicates comparison with high-intensity work
